# Supplementary material for: Libertellenone T, a Novel Compound Isolated from Endolichenic Fungus, Induces G2/M Phase Arrest, Apoptosis, and Autophagy by Activating the ROS/JNK Pathway in Colorectal Cancer Cells
Source: MDPI journal article supplement (doi:10.3390/cancers15020489), 2023-01-12
Supplement: s1 [file s1]

# **Libertellenone T, a Novel Compound Isolated from Endolichenic Fungus, Induces G2/M Phase Arrest, Apoptosis, and Autophagy by Activating the ROS/JNK Pathway in Colorectal Cancer Cells**

Chathurika D. B. Gamage <sup>1</sup>, Jeong-Hyeon Kim <sup>2</sup>, Yi Yang <sup>1</sup>, İsa Taş <sup>1</sup>, So-Yeon Park <sup>1</sup>, Rui Zhou <sup>1</sup>, Sultan Pulat <sup>1</sup>, Mücahit Varlı <sup>1</sup>, Jae-Seoun Hur <sup>3</sup>, Sang-Jip Nam <sup>2,\*</sup> and Hangun Kim <sup>1,\*</sup>

**Supplementary Table S1**

**Supplementary Figure S1–S9**

**Table S1.** Nucleotide sequence of EL000327

---

CACAGCTAGAGGGCAAGGACCATCAGAAGCGAATAAATATCACGCCGAGGTCTCTTGACAG  
CTTCTGCTGAAGGATTTAAGAGGGGATCGACCAAGGTTGATCCTCCTCCAGGTCCAGGTGC  
AATGCACCTGAGGATGTGTTTGATGACGCTCGAACAGGCATACCTCCCGGAATACCAGGA  
GGTGCAATGTGCGTTCAAAGATTCGATGATTCACTGAATTCTGCAATTCACACTACTTATCG  
CATTTGCTGCGTTCTTCATCGATACGAGAACCAAGAGATCCGTTGTTGAAAGTTTAACTT  
GTTTGCGGTGTTGTTAACTCGGACTGCCACGATGGAAATAACGAGGGTTTAAACGCTAT  
TACCGTGCGCCCTTGGGACGTAACCCCAAGGCTTTTCAGGGAGCAACCTCCGTTACCCGGG  
TAGGGTCAGAGGAAGCTGCAGGCAACACGGAAGCAACAGGAGAATGTTACAGGAGGGA  
GGAAATCAAATGATCACTTGAAGAGGATTCTTGATCCGTCCATAAGATGAAGGTATAGATG  
GAGGTCTTCGCCTAGCTGCAAGCTTGCGACGTCAATGCAACCCACCCACAGTCTAGGGTTT  
GACCCCTCCGGACTCAGCGGGTACCCACCCCTAGTTCCAGCAGATGCAGAGCAGAGCTAC  
TGGGACACAGAGGATTATGGGGTAGGGTGACGCCACCCGATCGGTTTACGCAAAGTGCCC  
ACGTACAAGCATCTATGCCACGACCCCGGTTAATCCTAGGCTTCCACGTTTGCCAGACTCG  
ATTCCCCAGTGGGAATCGGTGGGGACAGACAGCCAGTGGACTCAGCAGCGTTAACTGCCC  
ATCCCTTGACGCCCTACTATGGACAGGTGACACCACCCACAGCCATAGTAGCCCAAGGCA  
ATCCCTTACCACACTATCTGTTCCACGGCATCATGTTCAAGTATAGTGATGGTCAAGAGAT  
CTCAGATTGCCTCGATCGACTGATCTCCATGCCGATCCCATGGGCAGGACCCTCTTCAAGC  
ATTGCACTTTATTTAATGATCCTTCCGCAGGTTACCTAC

---

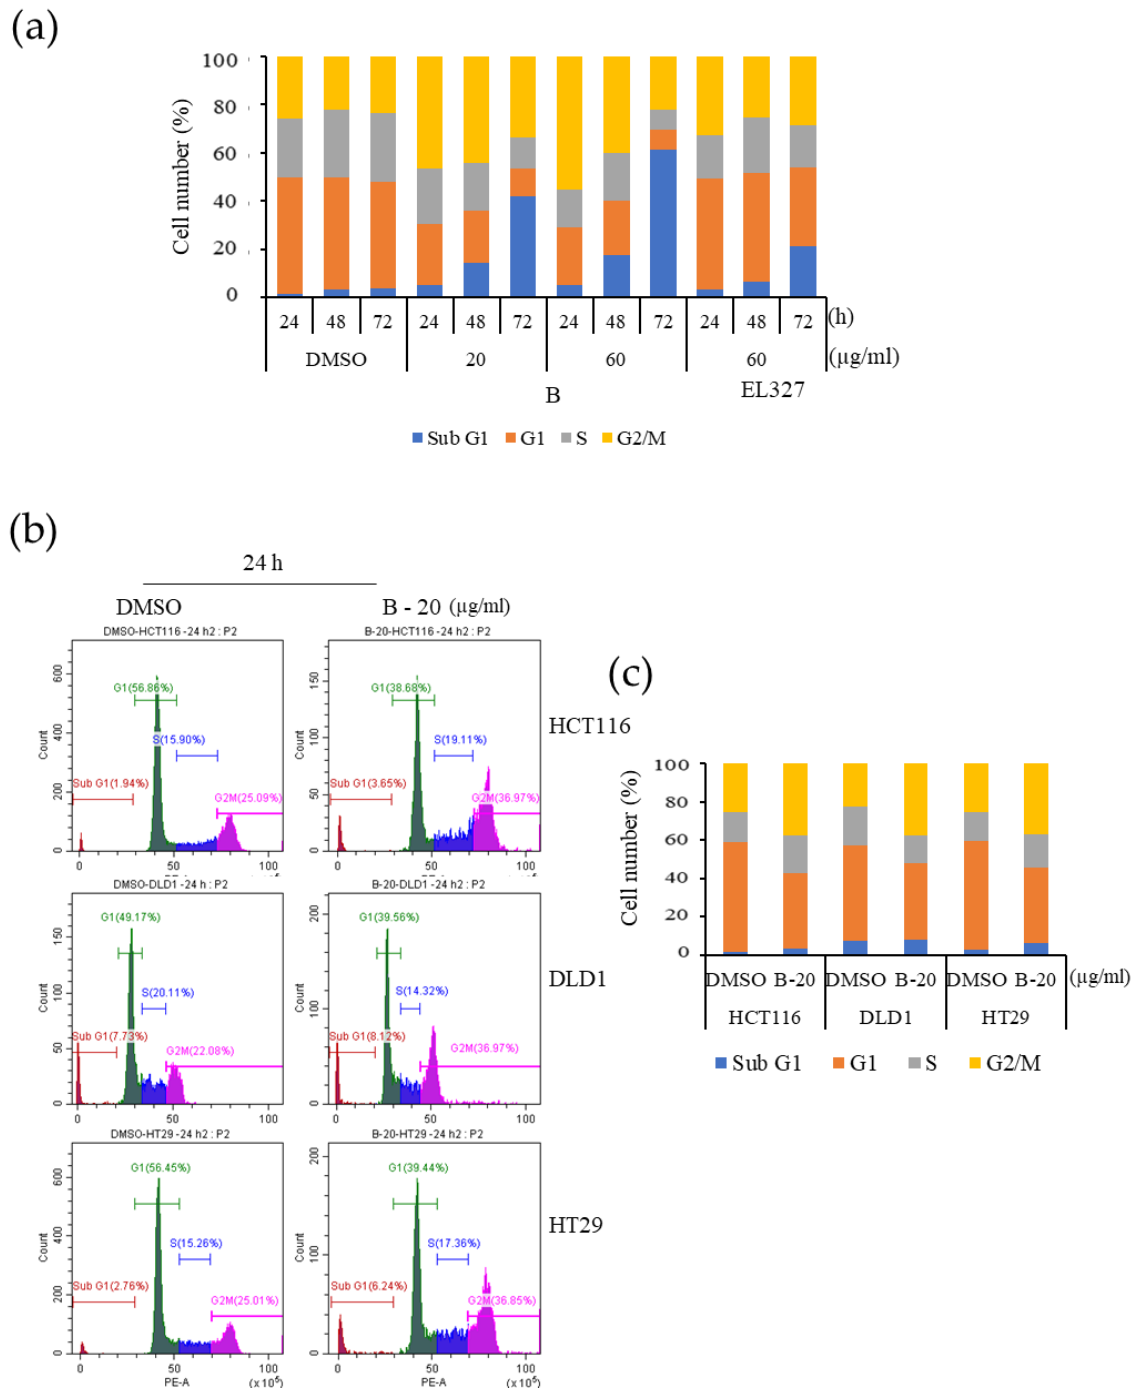

**Figure S1. B induces G2/M phase arrest in CRC cells.** (a) Quantitative analysis of percent cell distribution in each phase of the cell cycle upon the treatment of 20, 60 µg/ml of **B** and 60 µg/ml of EL000327 for 24, 48 and 72 h. (b) The flow cytometric analysis of the cell-cycle distribution of HCT116, DLD1 and HT29 cells treated with 20 µg/ml of **B** for 24 h. (c) Quantitative analysis of percent cell distribution in each phase of the cell cycle upon the treatment of 20 µg/ml of **B** for 24 h. n=3.

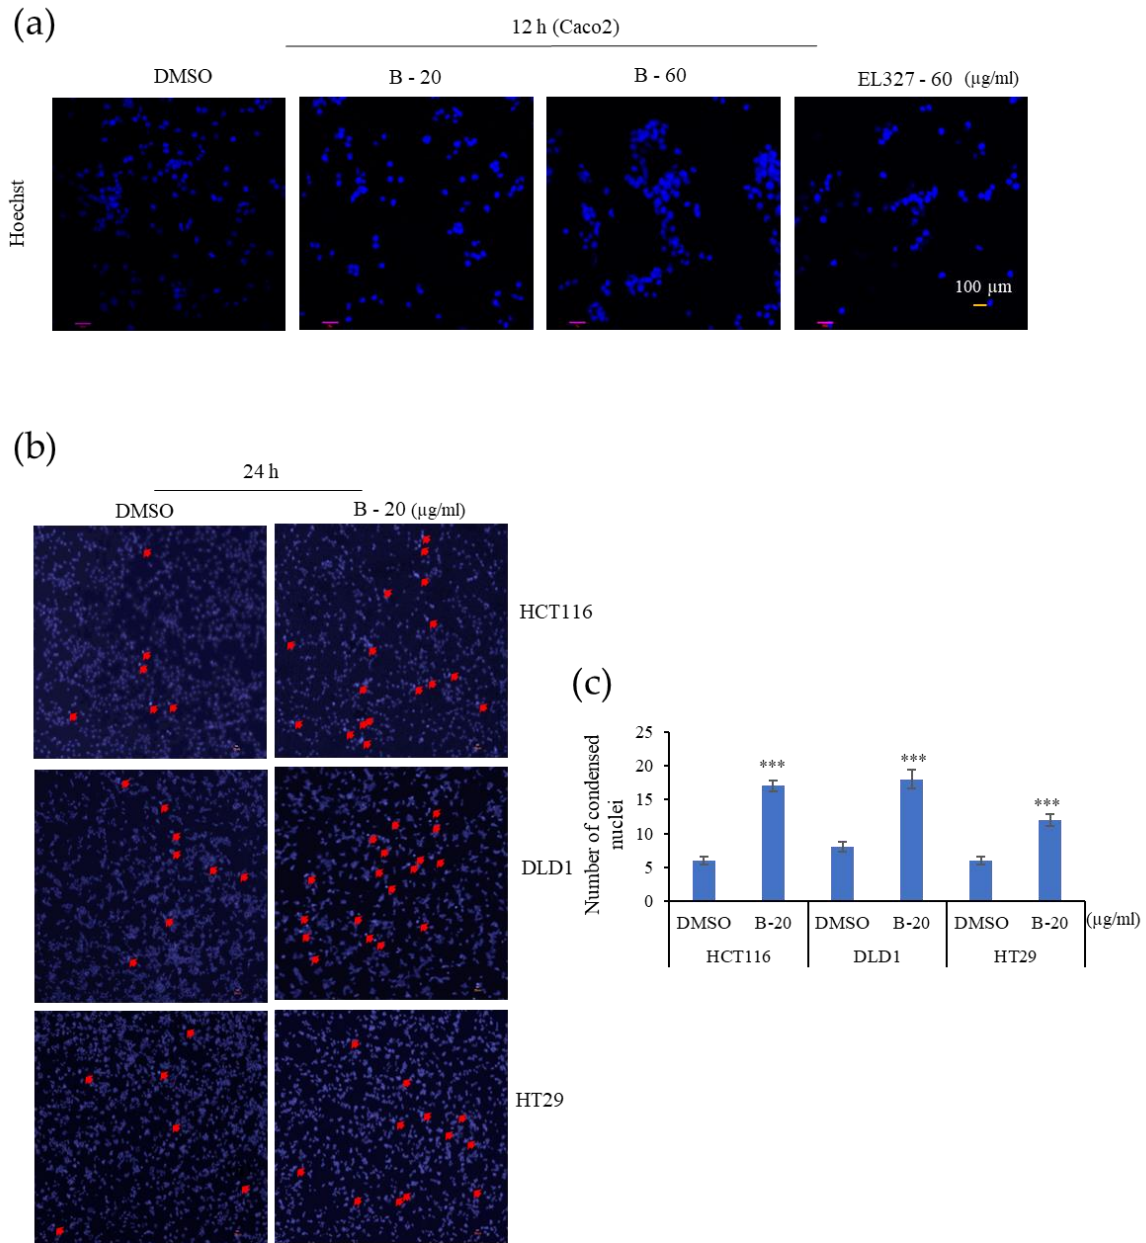

**Figure S2. B induces Nuclei condensation in CRC cells.** (a) Nuclei condensation of Caco2 cells upon treatment with **B** at the concentration of 20, 60 μg/ml and EL000327 at 60 μg/ml for 12 h, as determined by Hoechst staining. (b) HCT116, DLD1 and HT29 cells upon treatment with **B** at the concentration of 20 μg/ml for 24 h, as determined by Hoechst staining. Arrowheads indicate nuclear condensation in cells. (c) Quantification of condensed nuclei in HCT116, DLD1 and HT29 cells treated with 20 μg/ml of **B** for 24 h. n=3. Data represent mean ± S.D. \*\*\* p < 0.001, compared with the DMSO-treated control group.

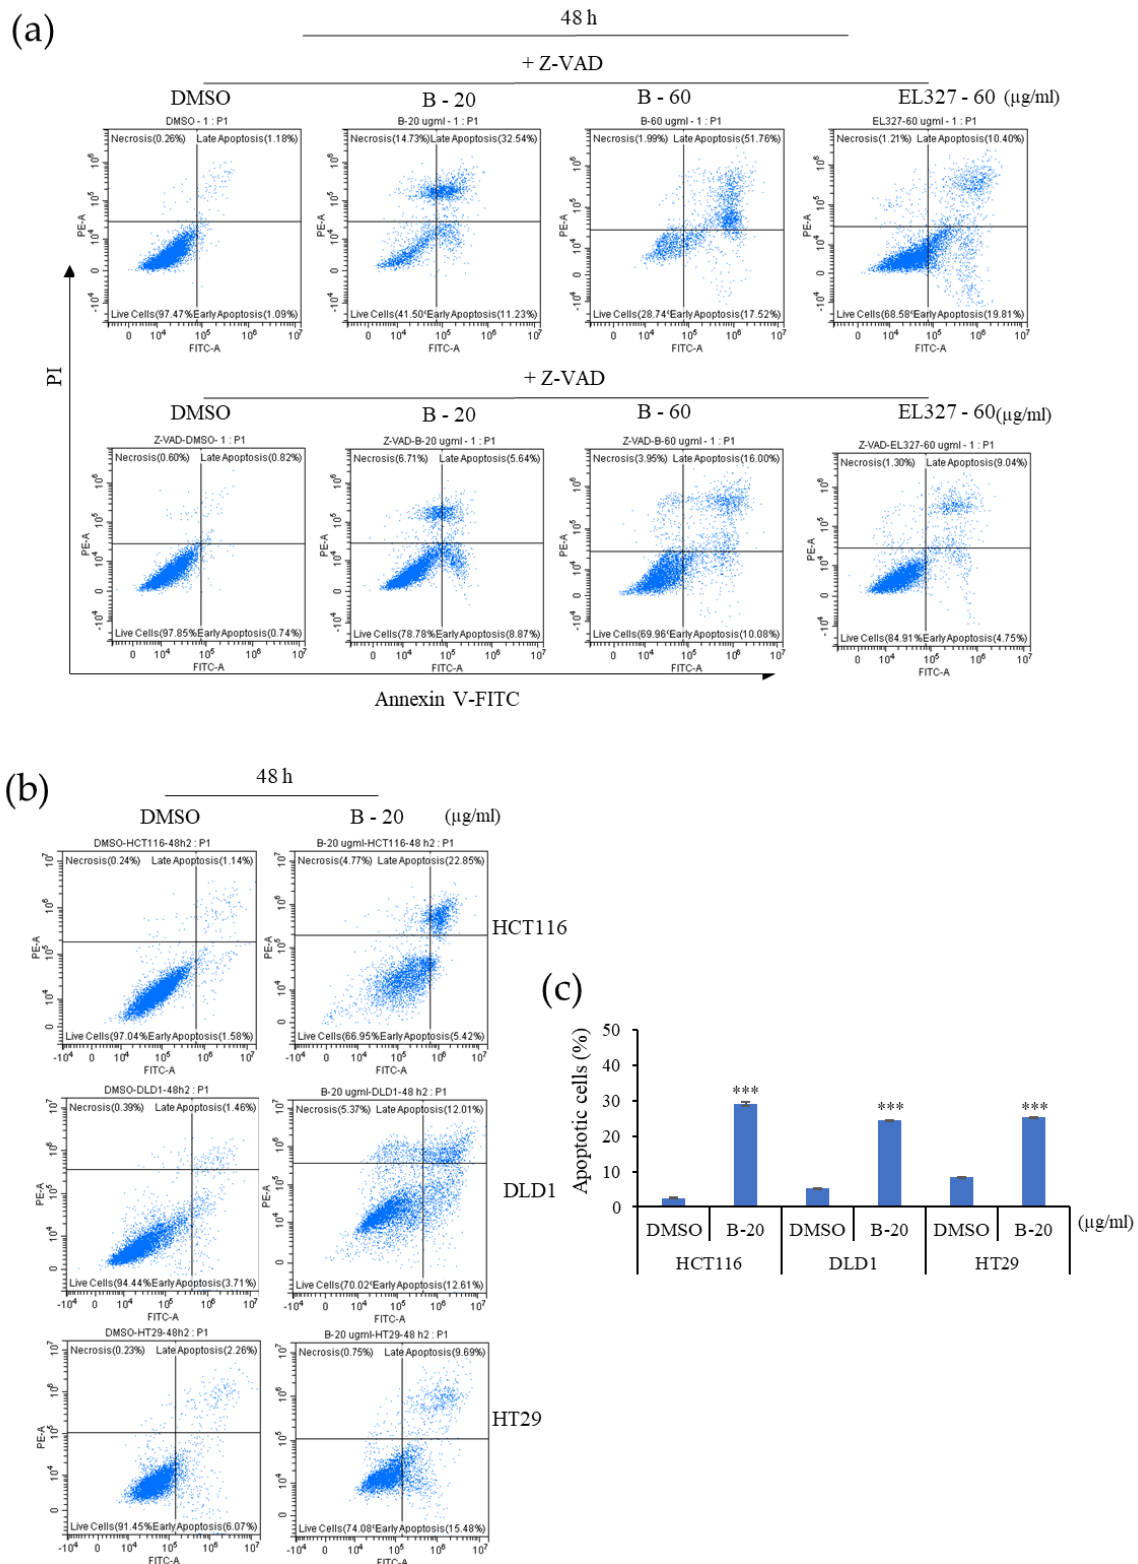

**Figure S3. B induces apoptosis in CRC cells.** (a) Flow cytometric analysis of dead cells stained by Annexin v-FITC (apoptotic cells) and PI (necrotic cells) upon treatment of **B** (20, 60 μg/ml) or EL000327 (60 μg/ml) for 48 h in presence or absence of Z-VAD-FMK (10 μM). (b) Flow cytometric analysis of apoptosis of HCT116, DLD1 and HT29 cells upon treatment of 20 μg/ml of **B** for 48 h. (c) Quantification of the percentage of apoptotic cells treated with 20 μg/ml of **B** and analyzed by flow cytometry. n=3. Data represent mean ± S.D. \*\*\* p < 0.001, compared with the DMSO-treated control group.

(a)

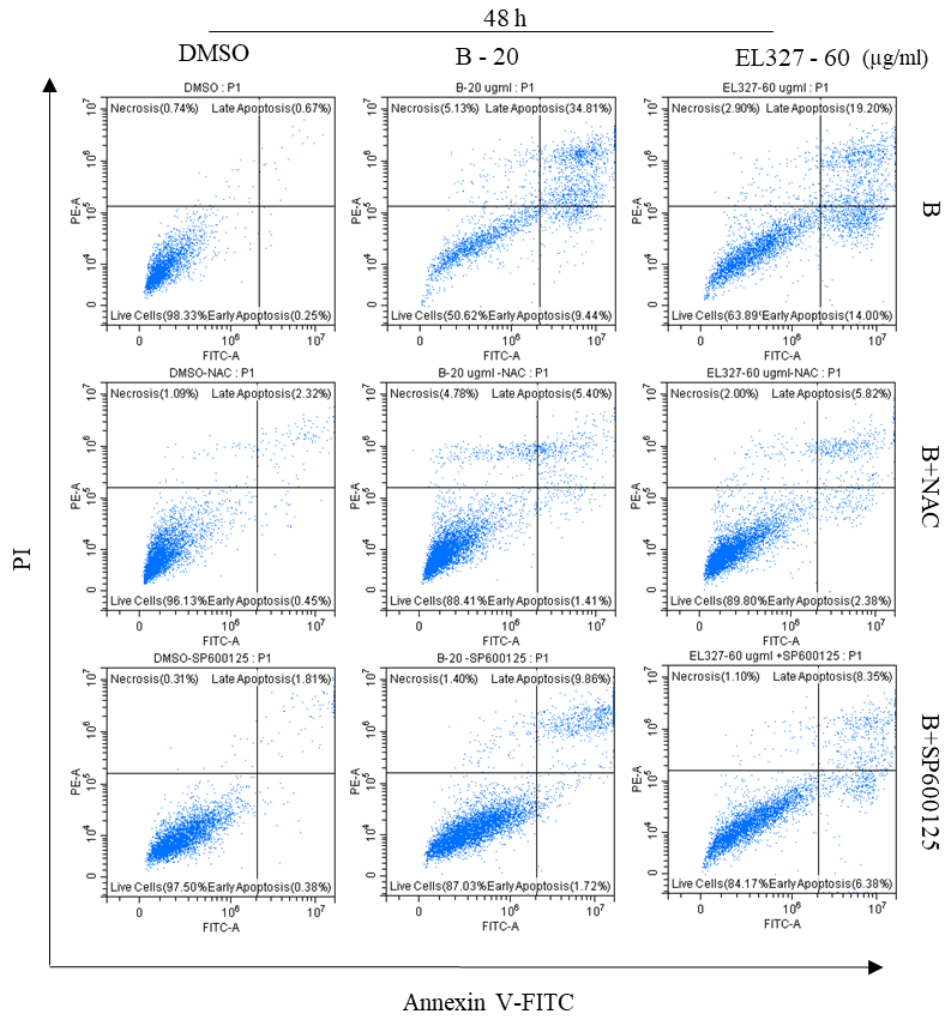

**Figure S4. B** decreased apoptosis in Caco2 cells in presence of ROS and JNK inhibitors. **(a)** Flow cytometric analysis of apoptotic cells stained by Annexin V-FITC and PI after treatment with **B** (20 µg/ml) or EL000327 (60 µg/ml) for 48 h, with or without NAC (5 mM) or SP600125 (10 µM).

(a)

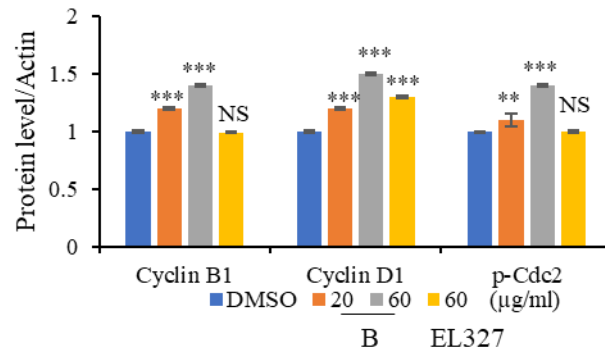

(b)

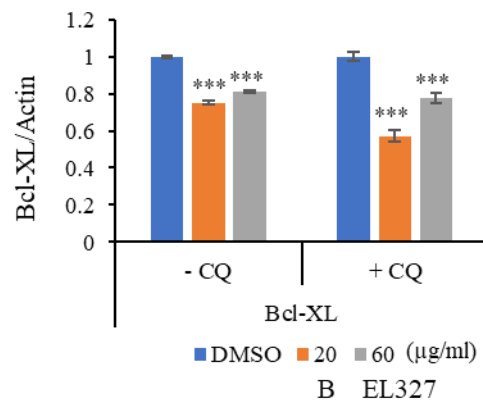

**Figure S5. B** modulated Cell cycle related protein expressions and anti-apoptotic protein Bcl-XL (a) Quantification of Cyclin B1, Cyclin D1 and p-Cdc2 protein expressions. (b) Quantification of Bcl-XL protein expressions in presence or absence of CQ. Data represent mean  $\pm$  S.D. \*\*  $p < 0.01$ , \*\*\*  $p < 0.001$ ; NS: no significant difference ( $p > 0.05$ ) compared with the DMSO-treated control.

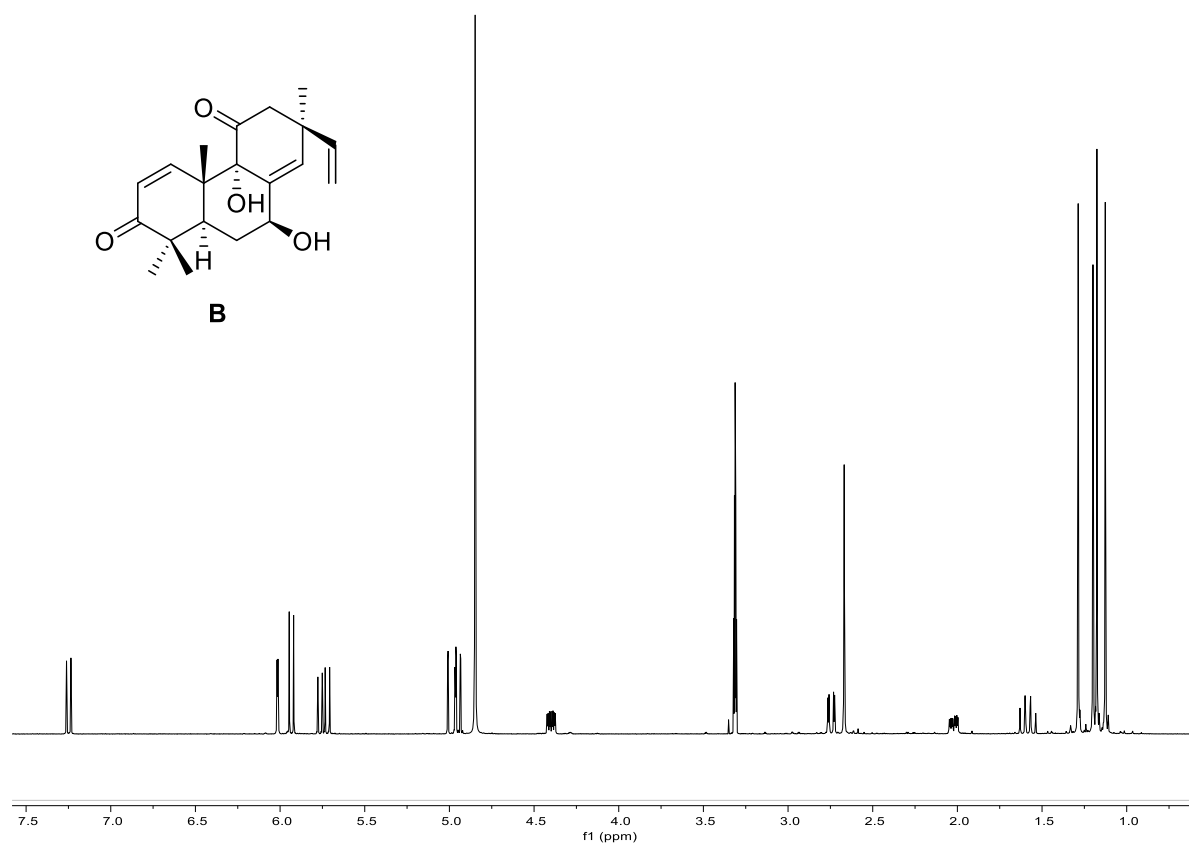

**Figure S6.**  $^1\text{H}$  NMR spectrum of Libertellenone T (**B**) in MeOD



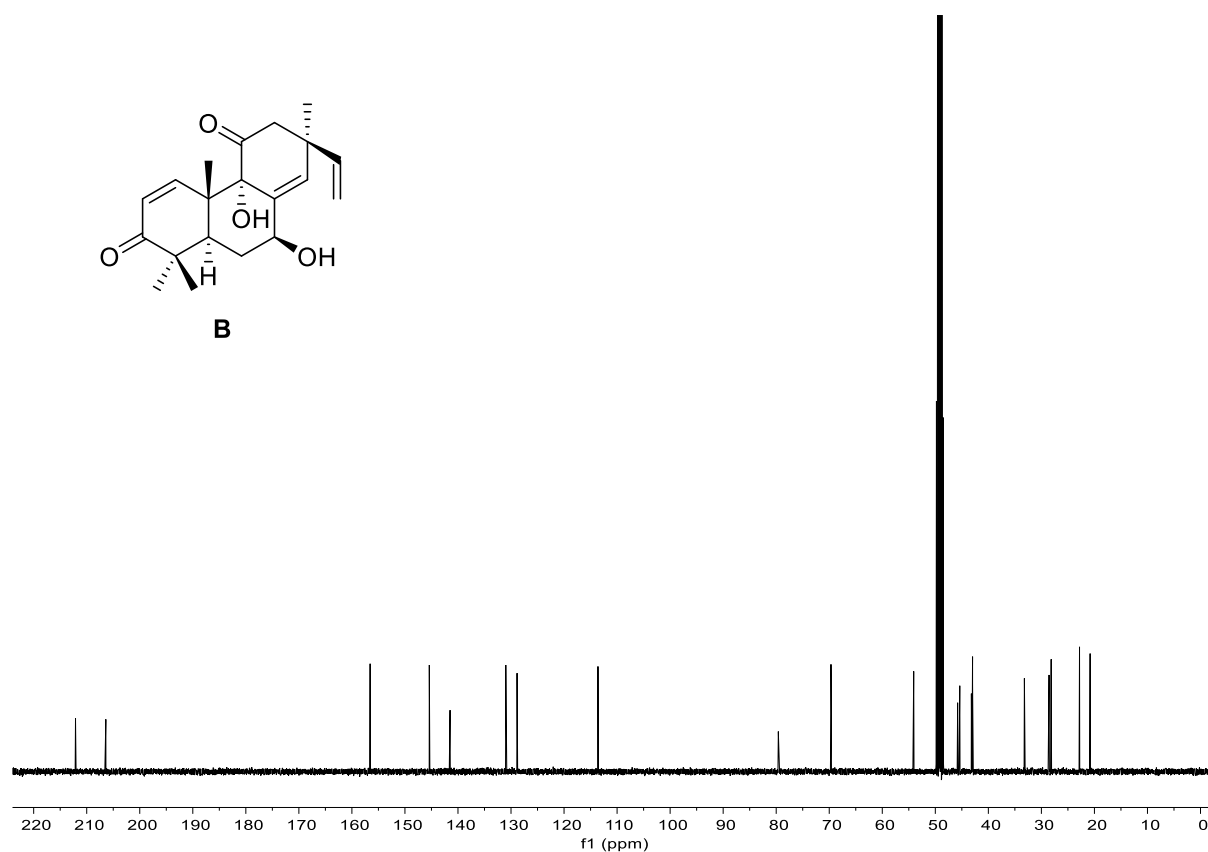

**Figure S7.** <sup>13</sup>C NMR spectrum of Libertellenone T (**B**) in MeOD

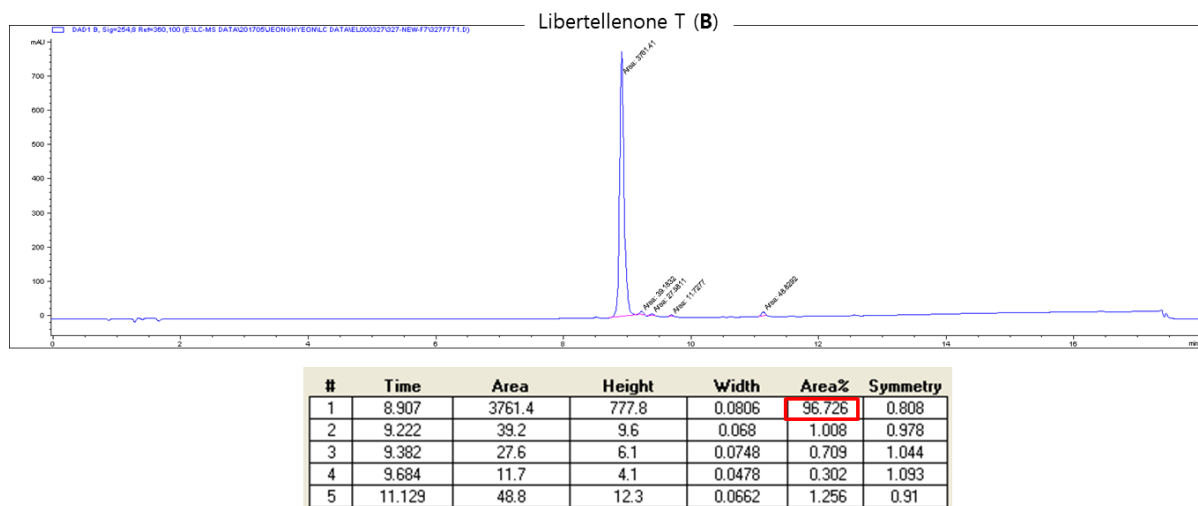

**Figure S8.** Percentage purity of Libertellenone T (B)

(a)

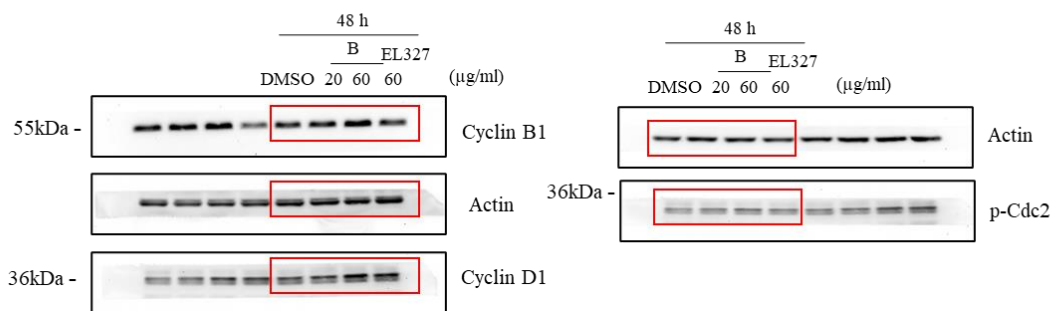

(b)

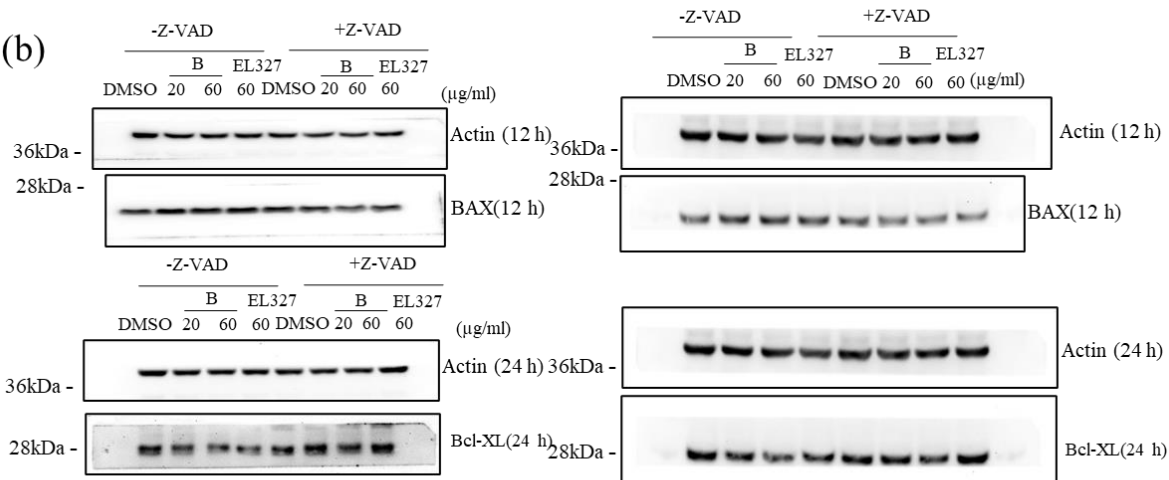

(c)

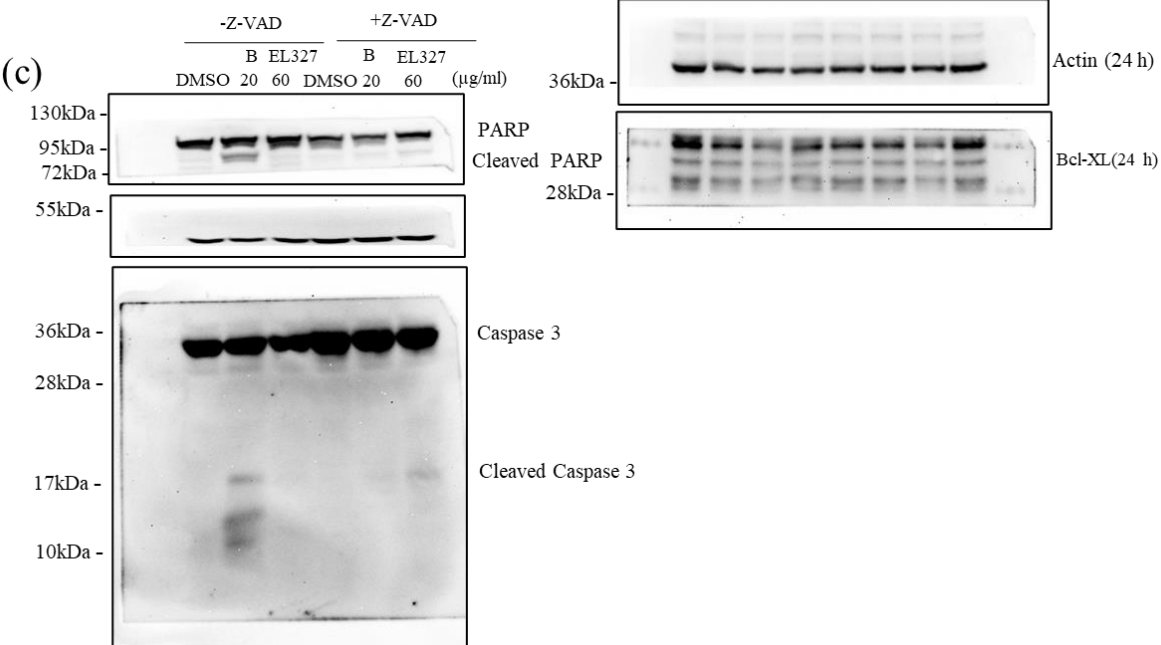

(d)

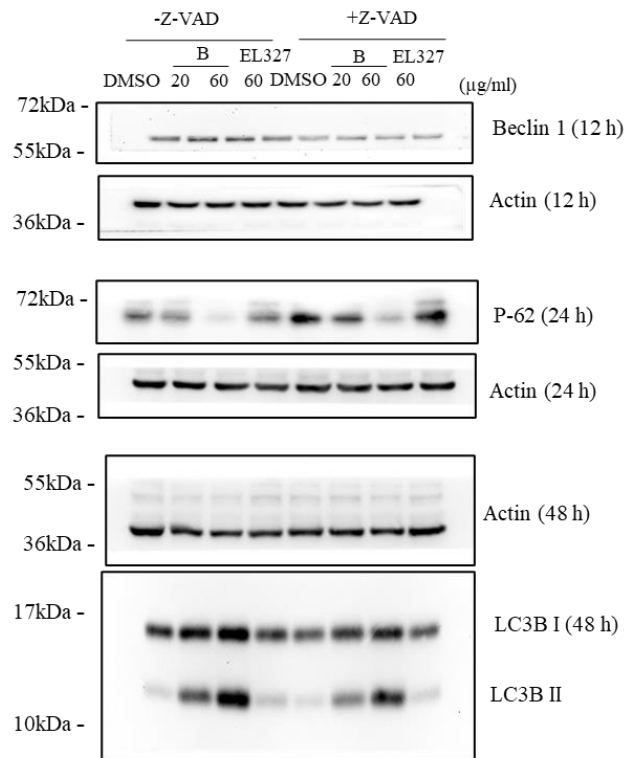

(e)

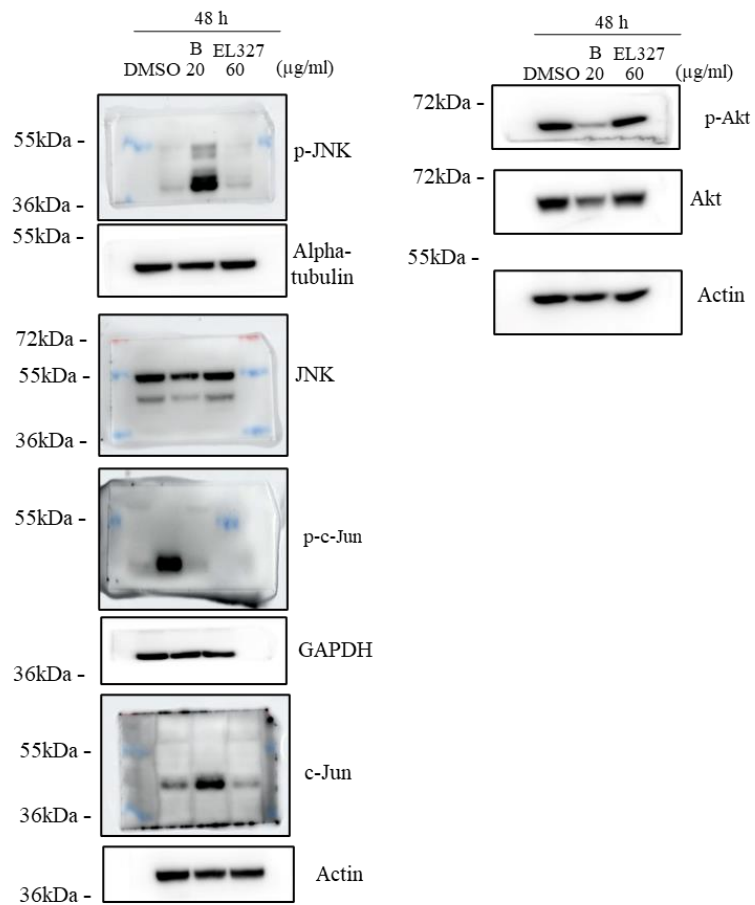

(f)

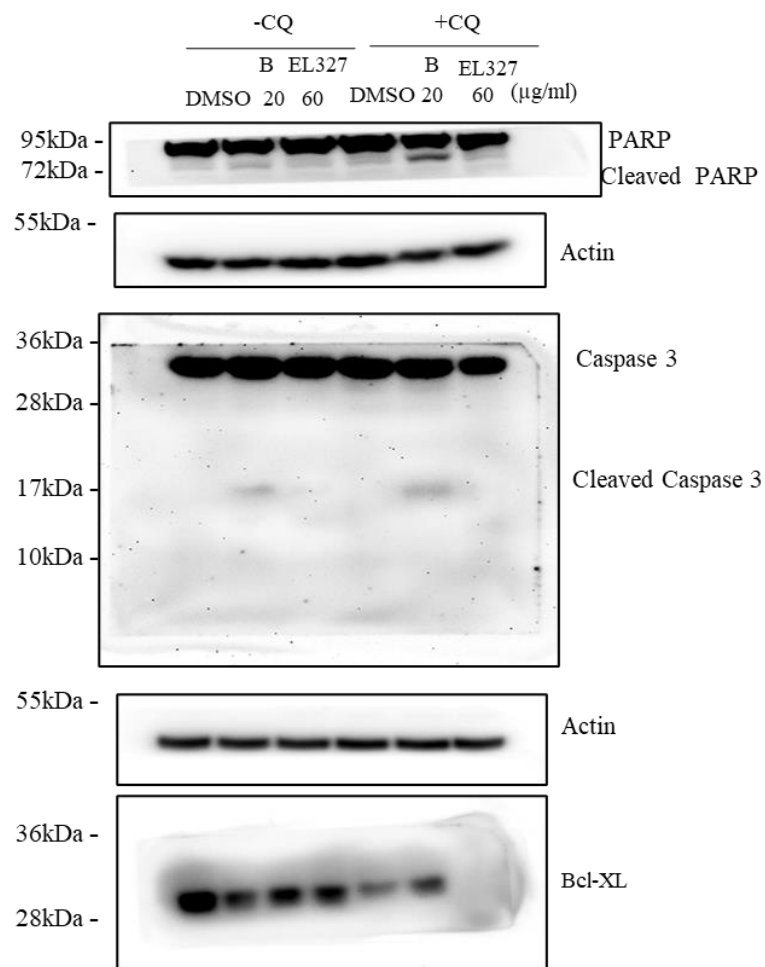

(g)

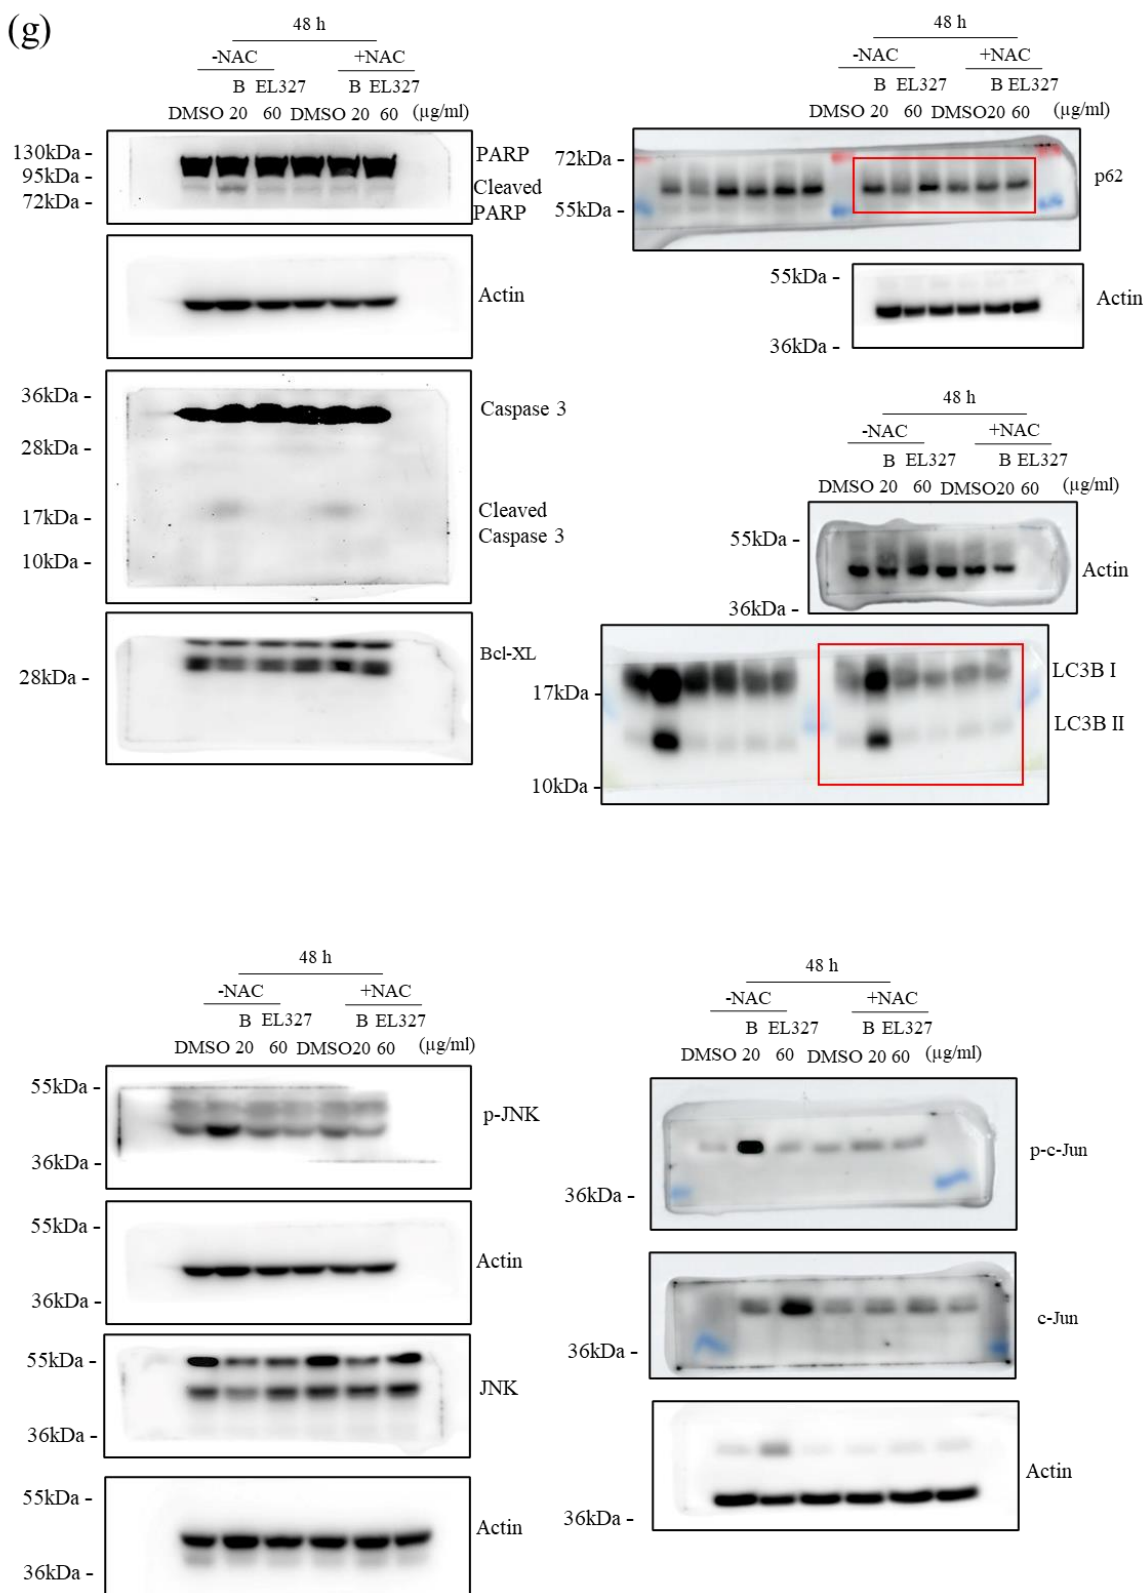

(h)

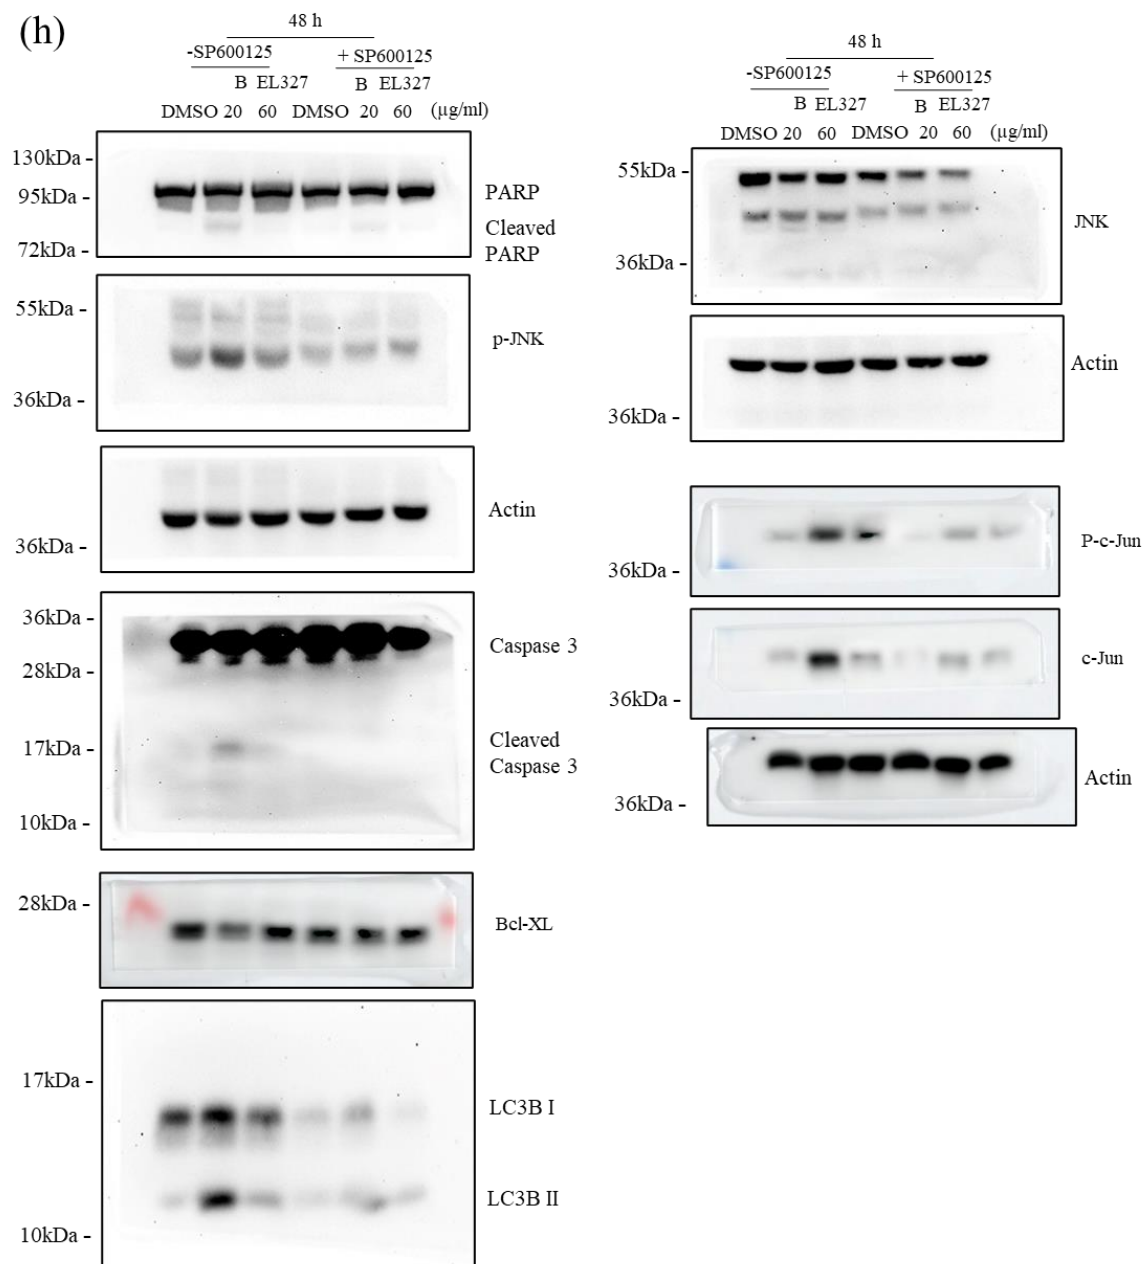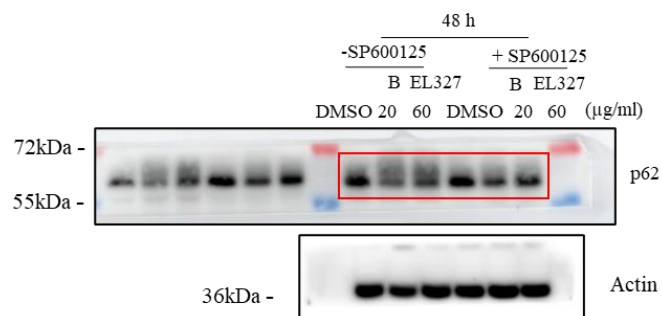

(I)

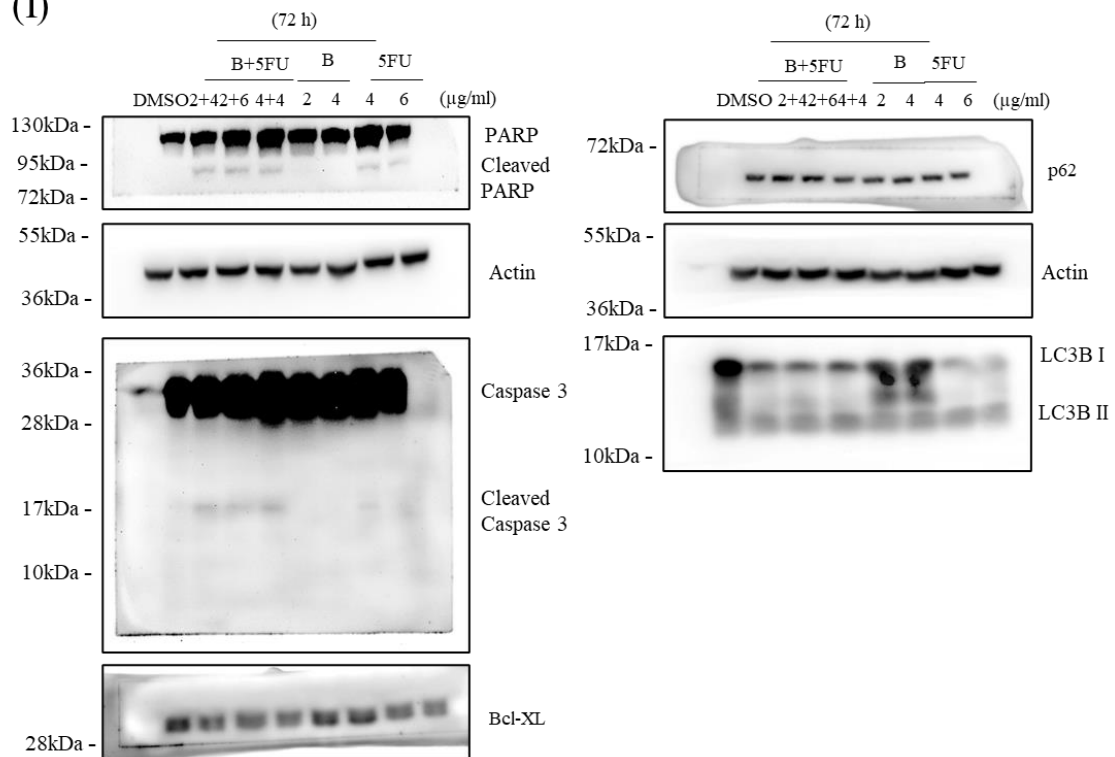

(J)

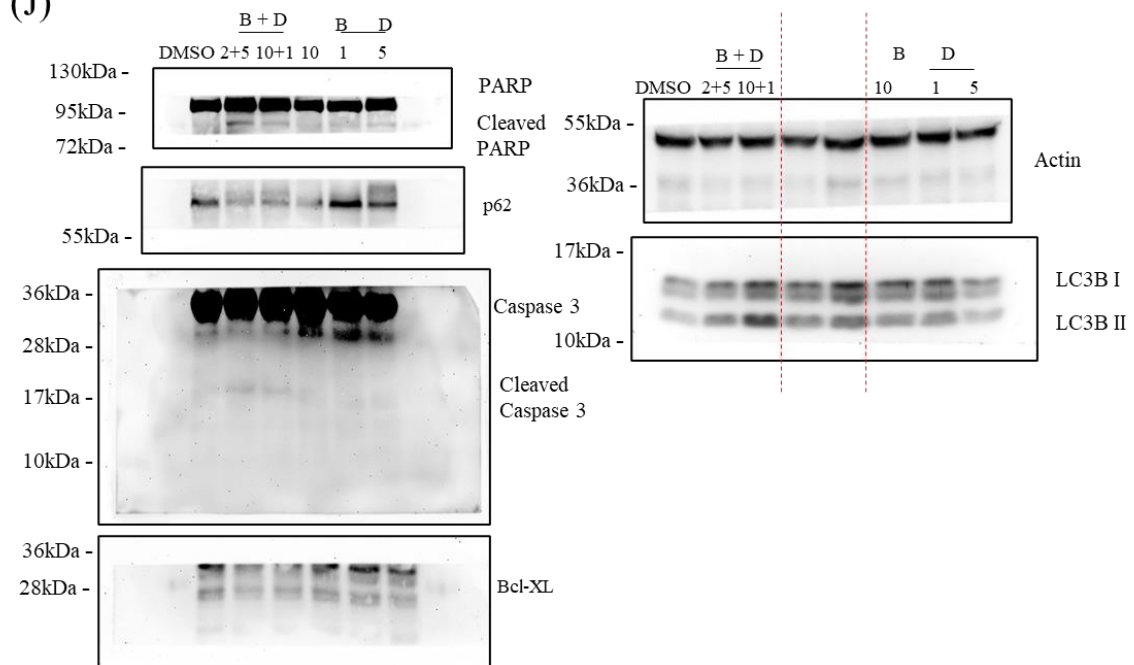

Figure S9. The raw data of western blotting
